# Supplementary figures and images for: Energetics and structures of the initial stages of nucleation of (SiO2)Nspecies: possible routes to highly symmetrical tetrahedral clusters
Source: Royal Society of Chemistry journal article supplement (doi:10.1039/b615455g), 2006-12-07

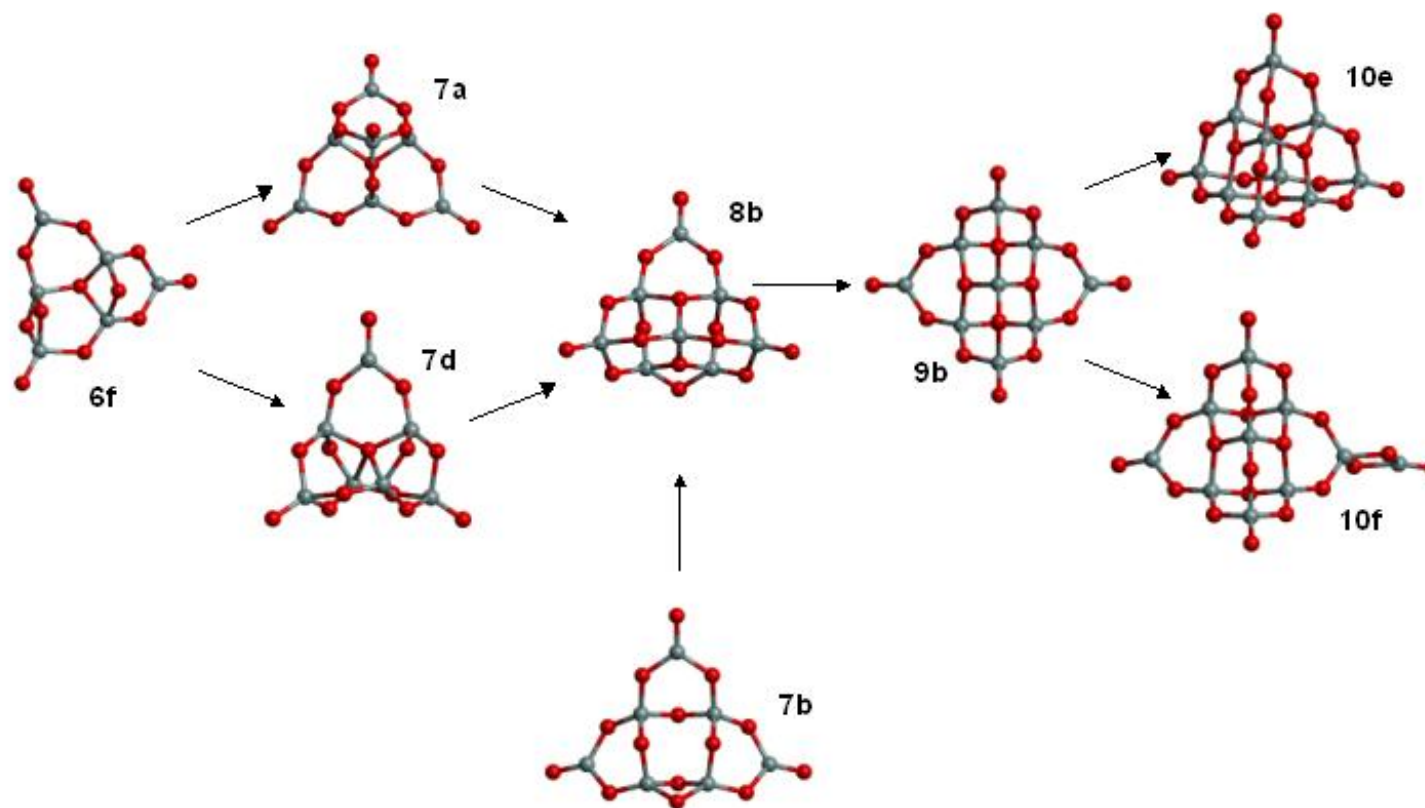

Figure S1

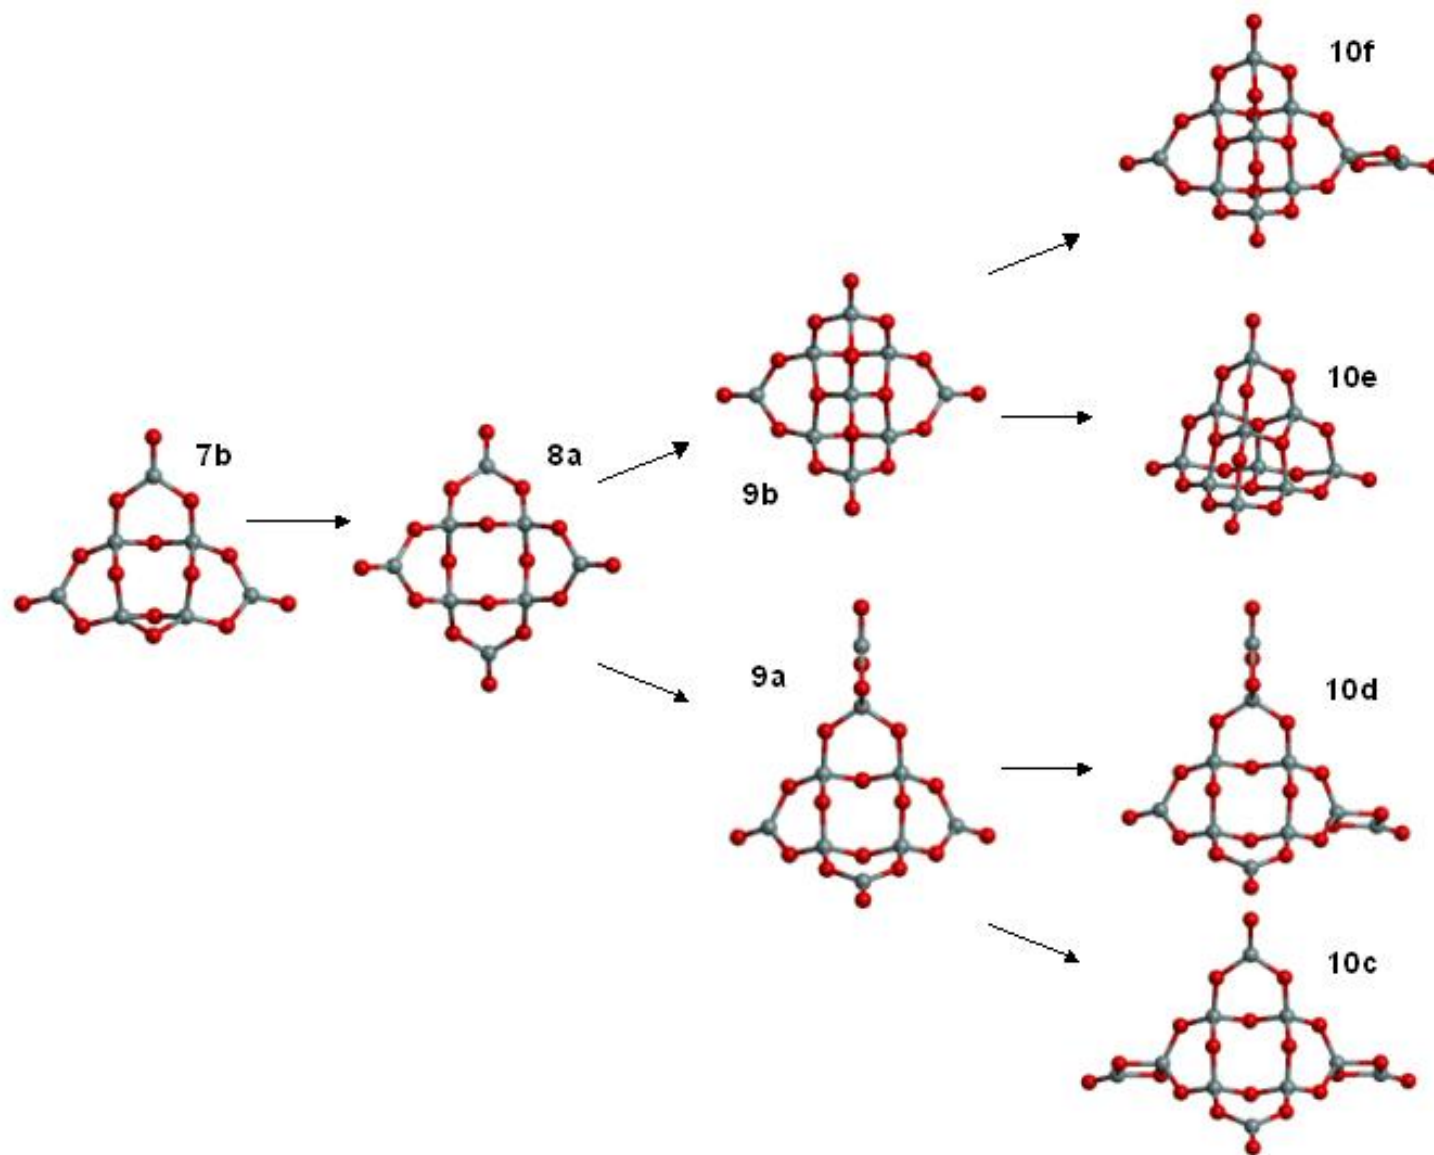

Figure S2

Supplement: b615455g.pdf [file b615455g.pdf]
